# Supplementary material for: Scoping Review of Clinical Evidence for the Health Benefits of Culinary Doses of Herbs and Spices for Prevention and Treatment of Metabolic Syndrome
Source: Preprints.org preprint supplement (doi:10.20944/preprints202310.1991.v1), 2023-10-31
Supplement: Supplementary file 3 [file supplementary]

## Sheet: Supplementary Table 1
Authors	Title	Year	Journal title	DOI	Link	Source	Reason for exclusion	Not culinary use	Herbal formula	Wrong population/outcome	Wrong herb/spice
Grant P.	Spearmint herbal tea has significant anti-androgen effects in polycystic ovarian syndrome. A randomized controlled trial	2010	Phytother Res. 2010 Feb;24(2):186-8. doi: 10.1002/ptr.2900.		10.1002/ptr.2900	PubMed	Anti-androgen effects, not metabolic disorder			1
Shimouchi A, Nose K, Takaoka M, Hayashi H, Kondo T.	Effect of dietary turmeric on breath hydrogen	2009	Dig Dis Sci. 2009 Aug;54(8):1725-9. doi: 10.1007/s10620-008-0550-1. Epub 2008 Nov 26.		10.1007/s10620-008-0550-1	PubMed	Breath hydrogen is a measure of GI disorders			1
Nadjarzadeh A, Ghadiri-Anari A, Ramezani-Jolfaie N, Mohammadi M, Salehi-Abargouei A, Namayande SM, Mozaffari-Khosravi H, Hosseini-Marnani E.	Effect of hypocaloric high-protein, low-carbohydrate diet supplemented with fennel on androgenic and anthropometric indices in overweight and obese women with polycystic ovary syndrome: A randomized placebo-controlled trial	2021	Complement Ther Med. 2021 Jan;56:102633. doi: 10.1016/j.ctim.2020.102633. Epub 2020 Nov 30.		10.1016/j.ctim.2020.102633	PubMed	Capsules were produced from fennel essential oil	1
Hesami S, Kavianpour M, Rashidi Nooshabadi M, Yousefi M, Lalooha F, Khadem Haghighian H.	Randomized, double-blind, placebo-controlled clinical trial studying the effects of Turmeric in combination with mefenamic acid in patients with primary dysmenorrhoea	2021	J Gynecol Obstet Hum Reprod. 2021 Apr;50(4):101840. doi: 10.1016/j.jogoh.2020.101840. Epub 2020 Jun 22.		10.1016/j.jogoh.2020.101840	PubMed	Combined turmeric with mefenamic acid		1
Khan AR, Mushtaq N, Fiaz H, Islam ZU	Antioxidative properties of spices and their impact on postprandial blood glucose in humans	2019	Advancements in Life Sciences. 7(1):5-9			Scopus	Doses used were too large (30g)	1
Rashid, R., Ahmad, H., Ahmed, Z., Rashid, F., Khalid, N.	Clinical investigation to modulate the effect of fenugreek polysaccharides on type-2 diabetes	2019	Bioactive Carbohydrates and Dietary Fibre	10.1016/j.bcdf.2019.100194	https://www.scopus.com/inward/record.uri?eid=2-s2.0-85068094651&doi=10.1016%2fj.bcdf.2019.100194&partnerID=40&md5=a1743a3100f1cb84762d804c483a04aa	Scopus	Extract	1
Soleimani, D., Paknahad, Z., Rouhani, M.H.	Therapeutic effects of garlic on hepatic steatosis in nonalcoholic fatty liver disease patients: A randomized clinical trial	2020	Diabetes, Metabolic Syndrome and Obesity: Targets and Therapy	10.2147/DMSO.S254555	https://www.scopus.com/inward/record.uri?eid=2-s2.0-85087560172&doi=10.2147%2fDMSO.S254555&partnerID=40&md5=58955b13b3c74b241258d73537591c3f	Scopus	Extract	1
Mahdavi-Roshan, M., Nasrollahzadeh, J., Zadeh, A.M., Zahedmehr, A.	Does garlic supplementation control blood pressure in patients with severe coronary artery disease? A clinical trial study	2016	Iranian Red Crescent Medical Journal	10.5812/ircmj.23871	https://www.scopus.com/inward/record.uri?eid=2-s2.0-84998978771&doi=10.5812%2fircmj.23871&partnerID=40&md5=b6e41564361f2db341bcaaae332610c8	Scopus	Extract	1
Noh, Y.-H., Kim, D.-H., Lee, S.-A., Yin, X.F., Park, J., Lee, M.Y., Lee, W.B., Lee, S.H., Kim, J.K., Kim, S.-S., Jeong, Y., Myung, S.-C., Kim, T.J., Kang, I.-J.	The Natural Substance MS-10 Improves and Prevents Menopausal Symptoms, Including Colpoxerosis, in Clinical Research	2016	Journal of Medicinal Food	10.1089/jmf.2015.3547	https://www.scopus.com/inward/record.uri?eid=2-s2.0-84962510488&doi=10.1089%2fjmf.2015.3547&partnerID=40&md5=b5ad9dff0c5b9eee1c44dbca8aca9be0	Scopus	Extract	1
Patcharatrakul T, Kriengkirakul C, Chaiwatanarat T, Gonlachanvit S.	Acute Effects of Red Chili, a Natural Capsaicin Receptor Agonist, on Gastric Accommodation and Upper Gastrointestinal Symptoms in Healthy Volunteers and Gastroesophageal Reflux Disease Patients	2020	Nutrients. 2020 Dec 4;12(12):3740. doi: 10.3390/nu12123740.		10.3390/nu12123740	PubMed	GI symptoms			1
Freitas e Silva-Santana NC	Turmeric supplementation with piperine is more effective than turmeric alone in attenuating oxidative stress and inflammation in hemodialysis patients: A randomized, double-blind clinical trial.	2022	Free Radical Biology and Medicine 193: 648-655. https://doi.org/10.1016/j.freeradbiomed.2022.11.008	10.1016/j.freeradbiomed.2022.11.008		PubMed	Haemodialysis patients, inappropriate population			1
Bumrungpert, A., Pavadhgul, P., Chongsuwat, R., Komindr, S.	Nutraceutical Improves Glycemic Control, Insulin Sensitivity, and Oxidative Stress in Hyperglycemic Subjects: A Randomized, Double-Blind, Placebo-Controlled Clinical Trial	2020	Natural Product Communications	10.1177/1934578X20918687	https://www.scopus.com/inward/record.uri?eid=2-s2.0-85087949340&doi=10.1177%2f1934578X20918687&partnerID=40&md5=0e4215d3ba473c3ac2d6edb2c9db0fd3	Scopus	Herbal formula		1
Parham, M., Bagherzadeh, M., Asghari, M., Akbari, H., Hosseini, Z., Rafiee, M., Vafaeimanesh, J.	Evaluating the effect of a herb on the control of blood glucose and insulin-resistance in patients with advanced type 2 diabetes (a double-blind clinical trial)	2020	Caspian Journal of Internal Medicine	10.22088/cjim.11.1.12	https://www.scopus.com/inward/record.uri?eid=2-s2.0-85077866893&doi=10.22088%2fcjim.11.1.12&partnerID=40&md5=b4b9d7018b69f0cf1f9a061b2c942b33	Scopus	Herbal formula		1
Kushwaha, V., Kar, A.	Clinical study on ayurvedic herbal drug (Mustadi kwatha ghanavti) therapy in patients with type 2 diabetes	2017	Indian Journal of Traditional Knowledge		https://www.scopus.com/inward/record.uri?eid=2-s2.0-85021050410&partnerID=40&md5=55ae5e55f27313bedbf27e825b22822c	Scopus	Herbal formula		1
Liu, M., Qiang, Q.H., Ling, Q., Yu, C.X., Li, X., Liu, S., Yang, S.	Effects of Danggui Sini decoction on neuropathic pain: Experimental studies and clinical pharmacological significance of inhibiting glial activation and proinflammatory cytokines in the spinal cord	2017	International Journal of Clinical Pharmacology and Therapeutics	10.5414/CP202613	https://www.scopus.com/inward/record.uri?eid=2-s2.0-85018847889&doi=10.5414%2fCP202613&partnerID=40&md5=605e690bdc7015d285b3b3ccf79d26fb	Scopus	Herbal formula		1
Said, O., Saad, B., Fulder, S., Khalil, K., Kassis, E.	Weight loss in animals and humans treated with "weighlevel", a combination of four medicinal plants used in traditional Arabic and Islamic medicine	2011	Evidence-based Complementary and Alternative Medicine	10.1093/ecam/nen067	https://www.scopus.com/inward/record.uri?eid=2-s2.0-80052717949&doi=10.1093%2fecam%2fnen067&partnerID=40&md5=83e1a92126f5e4ed38e8a24a004167f6	Scopus	Herbal formula		1
Bumrungpert, A., Pavadhgul, P., Chongsuwat, R., Komindr, S.	Nutraceutical Improves Glycemic Control, Insulin Sensitivity, and Oxidative Stress in Hyperglycemic Subjects: A Randomized, Double-Blind, Placebo-Controlled Clinical Trial	2020	Natural Product Communications	10.1177/1934578X20918687	https://www.scopus.com/inward/record.uri?eid=2-s2.0-85087949340&doi=10.1177%2f1934578X20918687&partnerID=40&md5=0e4215d3ba473c3ac2d6edb2c9db0fd3	Scopus	Herbal formula		1
Parham, M., Bagherzadeh, M., Asghari, M., Akbari, H., Hosseini, Z., Rafiee, M., Vafaeimanesh, J.	Evaluating the effect of a herb on the control of blood glucose and insulin-resistance in patients with advanced type 2 diabetes (a double-blind clinical trial)	2020	Caspian Journal of Internal Medicine	10.22088/cjim.11.1.12	https://www.scopus.com/inward/record.uri?eid=2-s2.0-85077866893&doi=10.22088%2fcjim.11.1.12&partnerID=40&md5=b4b9d7018b69f0cf1f9a061b2c942b33	Scopus	Herbal formula		1
Parham, M., Bagherzadeh, M., Asghari, M., Akbari, H., Hosseini, Z., Rafiee, M., Vafaeimanesh, J.	Evaluating the effect of a herb on the control of blood glucose and insulin-resistance in patients with advanced type 2 diabetes (a double-blind clinical trial)	2020	Caspian Journal of Internal Medicine	10.22088/cjim.11.1.12	https://www.scopus.com/inward/record.uri?eid=2-s2.0-85077866893&doi=10.22088%2fcjim.11.1.12&partnerID=40&md5=b4b9d7018b69f0cf1f9a061b2c942b33	Scopus	Herbal formula		1
Khastkhodaei, S., Sharifi, G., Salahi, R., Rahnamaeian, M., Moattar, F.	Clinical efficacy of Stragol™ herbal heart drop in ischemic heart failure of stable chest angina	2011	European Journal of Integrative Medicine	10.1016/j.eujim.2011.07.004	https://www.scopus.com/inward/record.uri?eid=2-s2.0-80054873185&doi=10.1016%2fj.eujim.2011.07.004&partnerID=40&md5=6647bb4242f1191f23b6647f1fc3f0fa	Scopus	Herbal formula		1
Capodice, J.L., Gorroochurn, P., Cammack, A.S., Goluboff, E., McKiernan, J.M., Benson, M.C., Stone, B.A., Katz, A.E.	Zyflamend in men with high-grade prostatic intraepithelial neoplasia: Results of a phase I clinical trial	2009	Journal of the Society for Integrative Oncology	10.2310/7200.2009.0012	https://www.scopus.com/inward/record.uri?eid=2-s2.0-67649394453&doi=10.2310%2f7200.2009.0012&partnerID=40&md5=2b333060c5b19dd8fbe30038eb0f092b	Scopus	Herbal formula		1
Zanzer YC , Plaza M , Dougkas A , Turner C , Östman E .	Black pepper-based beverage induced appetite-suppressing effects without altering postprandial glycaemia, gut and thyroid hormones or gastrointestinal well-being: a randomized crossover study in healthy subjects	2018	Food Funct. 2018 May 23;9(5):2774-2786. doi: 10.1039/c7fo01715d.		10.1039/c7fo01715d	PubMed	Inappropriate dosing. 20g used to make 200ml tea	1
Taghizadeh, M., Memarzadeh, M.R., Abedi, F., Sharifi, N., Karamali, F., Kashan, Z.F., Asemi, Z.	The effect of cumin cyminum l. Plus lime administration onweight loss and metabolic status in overweight subjects: A randomized double-blind placebo-controlled clinical trial	2016	Iranian Red Crescent Medical Journal	10.5812/ircmj.34212	https://www.scopus.com/inward/record.uri?eid=2-s2.0-84983334818&doi=10.5812%2fircmj.34212&partnerID=40&md5=94780e48362d063e173a97411f76324d	Scopus	Included lime with the cumin		1
Tang M, Larson-Meyer DE, Liebman M.	Effect of cinnamon and turmeric on urinary oxalate excretion, plasma lipids, and plasma glucose in healthy subjects	2008	Am J Clin Nutr. 2008 May;87(5):1262-7. doi: 10.1093/ajcn/87.5.1262.		10.1093/ajcn/87.5.1262	PubMed	Investigating oxalate levels rather than health benefits			1
Al-Jenoobi FI, Al-Thukair AA, Alam MA, Abbas FA, Al-Mohizea AM, Alkharfy KM, Al-Suwayeh SA.	Effect of Trigonella foenum-graecum L. on Metabolic Activity of CYP2D6 and CYP3A4	2015	Forsch Komplementmed. 2015;22(3):180-4. doi: 10.1159/000432412. Epub 2015 Jun 22.		10.1159/000432412	PubMed	Investigating the effect of fenugreek on liver enzymes and drug metabolism			1
Mennella JA, Johnson A, Beauchamp GK.	Garlic ingestion by pregnant women alters the odor of amniotic fluid	1995	Chem Senses. 1995 Apr;20(2):207-9. doi: 10.1093/chemse/20.2.207.		10.1093/chemse/20.2.207	PubMed	Irrelevant to general health			1
Milke P, Diaz A, Valdovinos MA, Moran S.	Gastroesophageal reflux in healthy subjects induced by two different species of chilli (Capsicum annum)	2006	Dig Dis. 2006;24(1-2):184-8. doi: 10.1159/000090323.		10.1159/000090323	PubMed	Looked at effect of type of chilli on gastroesophageal reflux			1
Pakfetrat M, Basiri F, Malekmakan L, Roozbeh J.	Effects of turmeric on uremic pruritus in end stage renal disease patients: a double-blind randomized clinical trial	2014	J Nephrol. 2014 Apr;27(2):203-7. doi: 10.1007/s40620-014-0039-2. Epub 2014 Jan 31.		10.1007/s40620-014-0039-2	PubMed	Looked at end stage renal disease. Not relevant to healthy populations			1
Imani H, Tabibi H, Najafi I, Atabak S, Hedayati M, Rahmani L.	Effects of ginger on serum glucose, advanced glycation end products, and inflammation in peritoneal dialysis patients	2015	Nutrition. 2015 May;31(5):703-7. doi: 10.1016/j.nut.2014.11.020. Epub 2014 Dec 20.		10.1016/j.nut.2014.11.020	PubMed	Looked at patients on peritoneal dialysis. Not appropriate data for healthy populations			1
De BK, Dutta D, Pal SK, Gangopadhyay S, Das Baksi S, Pani A.	The role of garlic in hepatopulmonary syndrome: a randomized controlled trial	2010	Can J Gastroenterol. 2010 Mar;24(3):183-8. doi: 10.1155/2010/349076.		10.1155/2010/349076	PubMed	Looked at serious health condition hepatopulmonary syndrome. Too different from healthy population to be relevant			1
Tabibi H, Imani H, Atabak S, Najafi I, Hedayati M, Rahmani L.	Effects of Ginger on Serum Lipids and Lipoproteins in Peritoneal Dialysis Patients: A Randomized Controlled Trial	2016	Perit Dial Int. 2016 Mar-Apr;36(2):140-5. doi: 10.3747/pdi.2015.00006. Epub 2015 Oct 16.		10.3747/pdi.2015.00006	PubMed	Looked at serious health condition peritoneal dialysis patients. Too different from healthy population to be relevant			1
Chahra C, Anis H, Bissene D, Mejda S, Jihène M, Salma N, Manel N, Sana BA, Hedi K, Maha BF.	The effect of Origanum majorana tea on motor and non-motor symptoms in patients with idiopathic Parkinson's disease: A randomized controlled pilot study	2021	Parkinsonism Relat Disord. 2021 Oct;91:23-27. doi: 10.1016/j.parkreldis.2021.08.013. Epub 2021 Aug 25.		10.1016/j.parkreldis.2021.08.013	PubMed	Looked at the effect of oregano on PD symptoms			1
Khajehdehi P, Pakfetrat M, Javidnia K, Azad F, Malekmakan L, Nasab MH, Dehghanzadeh G.	Oral supplementation of turmeric attenuates proteinuria, transforming growth factor-β and interleukin-8 levels in patients with overt type 2 diabetic nephropathy: a randomized, double-blind and placebo-controlled study	2011	Scand J Urol Nephrol. 2011 Nov;45(5):365-70. doi: 10.3109/00365599.2011.585622. Epub 2011 May 31.		10.3109/00365599.2011.585622	PubMed	Looked at the impact of turmeric on nephropathy. Not relevant to healthy populations			1
Citronberg J, Bostick R, Ahearn T, Turgeon DK, Ruffin MT, Djuric Z, Sen A, Brenner DE, Zick SM.	Effects of ginger supplementation on cell-cycle biomarkers in the normal-appearing colonic mucosa of patients at increased risk for colorectal cancer: results from a pilot, randomized, and controlled trial	2013	Cancer Prev Res (Phila). 2013 Apr;6(4):271-81. doi: 10.1158/1940-6207.CAPR-12-0327. Epub 2013 Jan 9.		10.1158/1940-6207.CAPR-12-0327	PubMed	Looking at cancer cell changes			1
Jiang Y, Turgeon DK, Wright BD, Sidahmed E, Ruffin MT, Brenner DE, Sen A, Zick SM.	Effect of ginger root on cyclooxygenase-1 and 15-hydroxyprostaglandin dehydrogenase expression in colonic mucosa of humans at normal and increased risk for colorectal cancer	2013	Eur J Cancer Prev. 2013 Sep;22(5):455-60. doi: 10.1097/CEJ.0b013e32835c829b.		10.1097/CEJ.0b013e32835c829b	PubMed	Looking at colorectal cancer and inflammation			1
Tuntipopipat S, Judprasong K, Zeder C, Wasantwisut E, Winichagoon P, Charoenkiatkul S, Hurrell R, Walczyk T.	Chili, but not turmeric, inhibits iron absorption in young women from an iron-fortified composite meal	2006	J Nutr. 2006 Dec;136(12):2970-4. doi: 10.1093/jn/136.12.2970.		10.1093/jn/136.12.2970	PubMed	Looking at iron absorption (chilli but not turmeric sig reduced iron absorption)			1
Nikkhah-Bodaghi M, Maleki I, Agah S, Hekmatdoost A.	Zingiber officinale and oxidative stress in patients with ulcerative colitis: A randomized, placebo-controlled, clinical trial	2019	Complement Ther Med. 2019 Apr;43:1-6. doi: 10.1016/j.ctim.2018.12.021. Epub 2019 Jan 2.		10.1016/j.ctim.2018.12.021	PubMed	Looking at pts with ulcerative colitis			1
Nielsen SE, Young JF, Daneshvar B, Lauridsen ST, Knuthsen P, Sandström B, Dragsted LO.	Effect of parsley (Petroselinum crispum) intake on urinary apigenin excretion, blood antioxidant enzymes and biomarkers for oxidative stress in human subjects	1999	Br J Nutr. 1999 Jun;81(6):447-55. doi: 10.1017/s000711459900080x.		10.1017/s000711459900080x	PubMed	Looks at antioxidant enzymes			1
Salem EM, Yar T, Bamosa AO, Al-Quorain A, Yasawy MI, Alsulaiman RM, Randhawa MA.	Comparative study of Nigella Sativa and triple therapy in eradication of Helicobacter Pylori in patients with non-ulcer dyspepsia	2010	Saudi J Gastroenterol. 2010 Jul-Sep;16(3):207-14. doi: 10.4103/1319-3767.65201.		10.4103/1319-3767.65201	PubMed	Looks at dyspepsia			1
Gonlachanvit S, Chen YH, Hasler WL, Sun WM, Owyang C.	Ginger reduces hyperglycemia-evoked gastric dysrhythmias in healthy humans: possible role of endogenous prostaglandins	2003	J Pharmacol Exp Ther. 2003 Dec;307(3):1098-103. doi: 10.1124/jpet.103.053421. Epub 2003 Oct 8.		10.1124/jpet.103.053421	PubMed	Looks at gastric dysrhythmias			1
Mammen RR, Natinga Mulakal J, Mohanan R, Maliakel B, Illathu Madhavamenon K.	Clove Bud Polyphenols Alleviate Alterations in Inflammation and Oxidative Stress Markers Associated with Binge Drinking: A Randomized Double-Blinded Placebo-Controlled Crossover Study	2018	J Med Food. 2018 Nov;21(11):1188-1196. doi: 10.1089/jmf.2017.4177. Epub 2018 Sep 20.		10.1089/jmf.2017.4177	PubMed	Looks at inflammation and oxidative stress after binge drinking			1
Mozaffari-Khosravi H, Naderi Z, Dehghan A, Nadjarzadeh A, Fallah Huseini H.	Effect of Ginger Supplementation on Proinflammatory Cytokines in Older Patients with Osteoarthritis: Outcomes of a Randomized Controlled Clinical Trial	2016	J Nutr Gerontol Geriatr. 2016 Jul-Sep;35(3):209-18. doi: 10.1080/21551197.2016.1206762.		10.1080/21551197.2016.1206762	PubMed	Looks at osteoarthritis			1
Nikkhah-Bodaghi M, Darabi Z, Agah S, Hekmatdoost A.	The effects of Nigella sativa on quality of life, disease activity index, and some of inflammatory and oxidative stress factors in patients with ulcerative colitis	2019	Phytother Res. 2019 Apr;33(4):1027-1032. doi: 10.1002/ptr.6296. Epub 2019 Jan 22.		10.1002/ptr.6296	PubMed	Looks at pts with ulcerative colitis			1
Bopp A, De Bona KS, Bellé LP, Moresco RN, Moretto MB.	Syzygium cumini inhibits adenosine deaminase activity and reduces glucose levels in hyperglycemic patients	2009	Fundam Clin Pharmacol. 2009 Aug;23(4):501-7. doi: 10.1111/j.1472-8206.2009.00700.x.		10.1111/j.1472-8206.2009.00700.x	PubMed	Medicinal relative of cumin family				1
Kennedy DO, Pace S, Haskell C, Okello EJ, Milne A, Scholey AB.	Effects of cholinesterase inhibiting sage (Salvia officinalis) on mood, anxiety and performance on a psychological stressor battery	2006	Neuropsychopharmacology. 2006 Apr;31(4):845-52. doi: 10.1038/sj.npp.1300907.		10.1038/sj.npp.1300907	PubMed	Mood and anxiety			1
Akhtar, S., Layla, A., Sestili, P., Ismail, T., Afzal, K., Rizvanov, A.A., Asad, M.H.H.B.	Glycemic and Insulinemic Responses of Vegetables and Beans Powders Supplemented Chapattis in Healthy Humans: A Randomized, Crossover Trial	2019	BioMed Research International	10.1155/2019/7425367	https://www.scopus.com/inward/record.uri?eid=2-s2.0-85074258276&doi=10.1155%2f2019%2f7425367&partnerID=40&md5=afe41a5b0efa455ddc9897af43fe7561	Scopus	No herb/spice				1
Shamshir, F., Abbas, G., Amjad, M., Rizwan, M., Akram, M., Ahmad, S., Tahir, M., Ali, S., Farooq, A.B.U.	Physiological and biochemical characterization of Kalongi (Nigella sativa) against arsenic stress: Implications for human health risk assessment	2022	Environmental Pollution	10.1016/j.envpol.2022.118829	https://www.scopus.com/inward/record.uri?eid=2-s2.0-85122613907&doi=10.1016%2fj.envpol.2022.118829&partnerID=40&md5=acf275b2e9d5af9cd6e36a6a9e1478ba	Scopus	Not a clinical trial			1
Amin, F., Islam, N., Anila, N., Gilani, A.H.	Clinical efficacy of the co-administration of Turmeric and Black seeds (Kalongi) in metabolic syndrome - A double blind randomized controlled trial - TAK-MetS trial	2015	Complementary Therapies in Medicine	10.1016/j.ctim.2015.01.008	https://www.scopus.com/inward/record.uri?eid=2-s2.0-84926410186&doi=10.1016%2fj.ctim.2015.01.008&partnerID=40&md5=65c717a636664c073c862c76f1bd6bc6	Scopus	Uses a combination of turmeric and nigella seed		1
Lien HC, Sun WM, Chen YH, Kim H, Hasler W, Owyang C.	Effects of ginger on motion sickness and gastric slow-wave dysrhythmias induced by circular vection	2003	Am J Physiol Gastrointest Liver Physiol. 2003 Mar;284(3):G481-9. doi: 10.1152/ajpgi.00164.2002.		10.1152/ajpgi.00164.2002	PubMed	Not about metabolic disorder			1
L. Gonçalves, L., Fernandes, T., Bernardo, M.A., A. Brito, J.	Assessment of Human Health Risk of Toxic Elements Due to Cinnamon Ingestion in the Diet	2019	Biological Trace Element Research	10.1007/s12011-018-1473-0	https://www.scopus.com/inward/record.uri?eid=2-s2.0-85053476527&doi=10.1007%2fs12011-018-1473-0&partnerID=40&md5=5026319eb627683714c5929234a03be1	Scopus	Not assessing cardiometabolic health			1
Ranasinghe, P., Jayawardena, R., Pigera, S., Wathurapatha, W.S., Weeratunga, H.D., Premakumara, G.A.S., Katulanda, P., Constantine, G.R., Galappaththy, P.	Evaluation of pharmacodynamic properties and safety of Cinnamomum zeylanicum (Ceylon cinnamon) in healthy adults: A phase I clinical trial	2017	BMC Complementary and Alternative Medicine	10.1186/s12906-017-2067-7	https://www.scopus.com/inward/record.uri?eid=2-s2.0-85039844865&doi=10.1186%2fs12906-017-2067-7&partnerID=40&md5=e53b92ea8d5c7c85832467325388ce35	Scopus	Not assessing cardiometabolic health			1
Mctavish, L., Wiltshire, E.	Effective treatment of hypoglycemia in children with type 1 diabetes: A randomized controlled clinical trial	2011	Pediatric Diabetes	10.1111/j.1399-5448.2010.00725.x	https://www.scopus.com/inward/record.uri?eid=2-s2.0-79957479378&doi=10.1111%2fj.1399-5448.2010.00725.x&partnerID=40&md5=24c2488aa61ac637a76ffc923cb3e837	Scopus	Not herb/spice				1
Abraham, K., Pfister, M., Wöhrlin, F., Lampen, A.	Relative bioavailability of coumarin from cinnamon and cinnamon-containing foods compared to isolated coumarin: A four-way crossover study in human volunteers	2011	Molecular Nutrition and Food Research	10.1002/mnfr.201000394	https://www.scopus.com/inward/record.uri?eid=2-s2.0-79953295952&doi=10.1002%2fmnfr.201000394&partnerID=40&md5=23f8e081f781b5cfe49fe2280098f065	Scopus	Not measuring cardiovascular function			1
Kimura, Y., Ito, H., Hatano, T.	Effects of mace and nutmeg on human cytochrome P450 3A4 and 2C9 activity	2010	Biological and Pharmaceutical Bulletin	10.1248/bpb.33.1977	https://www.scopus.com/inward/record.uri?eid=2-s2.0-78751550662&doi=10.1248%2fbpb.33.1977&partnerID=40&md5=48b4d1f9f3f3b92babdac603295665f7	Scopus	Not measuring cardiovascular function			1
Hioki, C., Arai, K., Takashi, M., Arai, M.	Development and evaluation of fundamental education about Kampo medicine adopting an experimental program in clinical pharmacy using team-based format	2008	Yakugaku Zasshi	10.1248/yakushi.128.1467	https://www.scopus.com/inward/record.uri?eid=2-s2.0-53249156227&doi=10.1248%2fyakushi.128.1467&partnerID=40&md5=065c129a8409bdfaf6fad91a5a499178	Scopus	Not measuring cardiovascular function			1
Al-Jenoobi, F.I., Al-Thukair, A.A., Abbas, F.A., Ansari, M.J., Alkharfy, K.M., Al-Mohizea, A.M., Al-Suwayeh, S.A., Jamil, S.	Effect of black seed on dextromethorphan o- and n-demethylation in human liver microsomes and healthy human subjects	2010	Drug Metabolism Letters	10.2174/187231210790980435	https://www.scopus.com/inward/record.uri?eid=2-s2.0-77953278946&doi=10.2174%2f187231210790980435&partnerID=40&md5=eea3aacb2e33a8f4eca54d1ec39f9956	Scopus	Not measuring cardiovascular function			1
Monien, B.H., Sachse, B., Niederwieser, B., Abraham, K.	Detection of N-Acetyl-S-[3′-(4-methoxyphenyl)allyl]-l-Cys (AMPAC) in Human Urine Samples after Controlled Exposure to Fennel Tea: A New Metabolite of Estragole and trans-Anethole	2019	Chemical Research in Toxicology	10.1021/acs.chemrestox.9b00287	https://www.scopus.com/inward/record.uri?eid=2-s2.0-85073480895&doi=10.1021%2facs.chemrestox.9b00287&partnerID=40&md5=cd51ff654d60898ebc16f5ebe108f093	Scopus	Not measuring cardiovascular function			1
Zeller, A., Horst, K., Rychlik, M.	Study of the metabolism of estragole in humans consuming fennel tea	2009	Chemical Research in Toxicology	10.1021/tx900236g	https://www.scopus.com/inward/record.uri?eid=2-s2.0-73849093207&doi=10.1021%2ftx900236g&partnerID=40&md5=3501f4d1372f56aa4e88edcaaff58171	Scopus	Not measuring cardiovascular function			1
Venkata Raman, B., Sravani, B., Phani Rekha, P., Lalitha, K.V.N., Narasimha Rao, B.	Effect of plant lectins on human blood group antigens with special focus on plant foods and juices	2012	International Journal of Research in Ayurveda and Pharmacy		https://www.scopus.com/inward/record.uri?eid=2-s2.0-84897918560&partnerID=40&md5=437ca58dbc97240c0e0c741fa643126e	Scopus	Not measuring cardiovascular function			1
Livingstone, T.L., Saha, S., Bernuzzi, F., Savva, G.M., Troncoso-Rey, P., Traka, M.H., Mills, R.D., Ball, R.Y., Mithen, R.F.	Accumulation of Sulforaphane and Alliin in Human Prostate Tissue	2022	Nutrients	10.3390/nu14163263	https://www.scopus.com/inward/record.uri?eid=2-s2.0-85136534189&doi=10.3390%2fnu14163263&partnerID=40&md5=1b4f490abed4735125b033f538c789c5	Scopus	Not measuring cardiovascular function			1
Delgado‐losada, M.L., Bouhaben, J., Ruiz‐huerta, C., Canto, M.V., Delgado‐lima, A.H.	Long‐Lasting Olfactory Dysfunction in Hospital Workers Due to COVID‐19: Prevalence, Clinical Characteristics, and Most Affected Odorants	2022	International Journal of Environmental Research and Public Health	10.3390/ijerph19095777	https://www.scopus.com/inward/record.uri?eid=2-s2.0-85129724741&doi=10.3390%2fijerph19095777&partnerID=40&md5=902af3880cf4ef3d3ff4feaa3d9940ac	Scopus	Not measuring cardiovascular function			1
Sato, S., Sekine, Y., Kakumu, Y., Hiramoto, T.	Measurement of diallyl disulfide and allyl methyl sulfide emanating from human skin surface and influence of ingestion of grilled garlic	2020	Scientific Reports	10.1038/s41598-019-57258-1	https://www.scopus.com/inward/record.uri?eid=2-s2.0-85077941612&doi=10.1038%2fs41598-019-57258-1&partnerID=40&md5=346fdc2ba9380ce236028b0f72be0ade	Scopus	Not measuring cardiovascular function			1
Scheffler, L., Sharapa, C., Buettner, A.	Quantification of volatile metabolites derived from garlic in human breast milk	2019	Food Chemistry	10.1016/j.foodchem.2018.09.039	https://www.scopus.com/inward/record.uri?eid=2-s2.0-85053078115&doi=10.1016%2fj.foodchem.2018.09.039&partnerID=40&md5=2292ae79464be6999c3a1a88375f8a8c	Scopus	Not measuring cardiovascular function			1
Scheffler, L., Sharapa, C., Amar, T., Buettner, A.	Identification and Quantification of Volatile Ramson-Derived Metabolites in Humans	2018	Frontiers in Chemistry	10.3389/fchem.2018.00410	https://www.scopus.com/inward/record.uri?eid=2-s2.0-85056741352&doi=10.3389%2ffchem.2018.00410&partnerID=40&md5=cd88e57326282316f8aa3422d45f3c01	Scopus	Not measuring cardiovascular function			1
Scheffler, L., Sauermann, Y., Heinlein, A., Sharapa, C., Buettner, A.	Detection of volatile metabolites derived from garlic (Allium sativum) in human urine	2016	Metabolites	10.3390/metabo6040043	https://www.scopus.com/inward/record.uri?eid=2-s2.0-85010383507&doi=10.3390%2fmetabo6040043&partnerID=40&md5=20fabd171cf46e7272c25e067a9764b9	Scopus	Not measuring cardiovascular function			1
Nurmi, A., Nurmi, T., Mursu, J., Hiltunen, R., Voutilainen, S.	Ingestion of oregano extract increases excretion of urinary phenolic metabolites in humans	2006	Journal of Agricultural and Food Chemistry	10.1021/jf060879n	https://www.scopus.com/inward/record.uri?eid=2-s2.0-33748429669&doi=10.1021%2fjf060879n&partnerID=40&md5=380bd30a6daf26375dda20e4e95266e8	Scopus	Not measuring cardiovascular function			1
Sjövall, P., Skedung, L., Gregoire, S., Biganska, O., Clément, F., Luengo, G.S.	Imaging the distribution of skin lipids and topically applied compounds in human skin using mass spectrometry	2018	Scientific Reports	10.1038/s41598-018-34286-x	https://www.scopus.com/inward/record.uri?eid=2-s2.0-85056347342&doi=10.1038%2fs41598-018-34286-x&partnerID=40&md5=231d4d5cda40923d0e9c844de45becc1	Scopus	Not measuring cardiovascular function			1
Kohlert, C., Schindler, G., März, R.W., Abel, G., Brinkhaus, B., Derendorf, H., Gräfe, E.-U., Veit, M.	Systemic availability and pharmacokinetics of thymol in humans	2002	Journal of Clinical Pharmacology	10.1177/009127002401102678	https://www.scopus.com/inward/record.uri?eid=2-s2.0-0035998750&doi=10.1177%2f009127002401102678&partnerID=40&md5=6051cbe9613939d69358c7763c68b4fc	Scopus	Not measuring cardiovascular function			1
Charron, C.S., Dawson, H.D., Albaugh, G.P., Solverson, P.M., Vinyard, B.T., Solano-Aguilar, G.I., Molokin, A., Novotny, J.A.	A single meal containing raw, crushed garlic influences expression of immunity- and cancer-related genes in whole blood of humans	2015	Journal of Nutrition	10.3945/jn.115.215392	https://www.scopus.com/inward/record.uri?eid=2-s2.0-84949642280&doi=10.3945%2fjn.115.215392&partnerID=40&md5=02129bad6cf1317b1f88acd2b9a3c385	Scopus	Not measuring cardiovascular function/metabolic health			1
Lawson LD, Hunsaker SM.	Allicin Bioavailability and Bioequivalence from Garlic Supplements and Garlic Foods	2018	Nutrients. 2018 Jun 24;10(7):812. doi: 10.3390/nu10070812.		10.3390/nu10070812	PubMed	Not relating to a health outcome			1
Myers BM, Smith JL, Graham DY.	Effect of red pepper and black pepper on the stomach	1987	Am J Gastroenterol. 1987 Mar;82(3):211-4.			PubMed	Not relating to a health outcome			1
Achour, M., Bravo, L., Sarriá, B., Ben Fredj, M., Nouira, M., Mtiraoui, A., Saguem, S., Mateos, R.	Bioavailability and nutrikinetics of rosemary tea phenolic compounds in humans	2021	Food Research International	10.1016/j.foodres.2020.109815	https://www.scopus.com/inward/record.uri?eid=2-s2.0-85095583485&doi=10.1016%2fj.foodres.2020.109815&partnerID=40&md5=f6b74dccaa21a1a87b147b6ce5da8f63	Scopus	Pharmacokinetic analysis			1
Shishehbor	Cinnamon Consumption Improves Clinical Symptoms and Inflammatory Markers in Women With Rheumatoid Arthritis	2018	Journal of the American College of Nutrition, 37:8, 685-690, DOI: 10.1080/07315724.2018.1460733	10.1080/07315724.2018.1460733		PubMed	Population was individuals with RA			1
Charron CS, Dawson HD, Albaugh GP, Solverson PM, Vinyard BT, Solano-Aguilar GI, Molokin A, Novotny JA.	A Single Meal Containing Raw, Crushed Garlic Influences Expression of Immunity- and Cancer-Related Genes in Whole Blood of Humans	2015	J Nutr. 2015 Nov;145(11):2448-55. doi: 10.3945/jn.115.215392. Epub 2015 Sep 30.		10.3945/jn.115.215392	PubMed	Refers to immunity and cancer genes			1
Haj-Husein I, Tukan S, Alkazaleh F.	The effect of marjoram (Origanum majorana) tea on the hormonal profile of women with polycystic ovary syndrome: a randomised controlled pilot study	2016	J Hum Nutr Diet. 2016 Feb;29(1):105-11. doi: 10.1111/jhn.12290. Epub 2015 Feb 9.		10.1111/jhn.12290	PubMed	Refers to marjoram rather than oregano				1
Borges G, Fong RY, Ensunsa JL, Kimball J, Medici V, Ottaviani JI, Crozier A.	Absorption, distribution, metabolism and excretion of apigenin and its glycosides in healthy male adults	2022	Free Radic Biol Med. 2022 May 20;185:90-96. doi: 10.1016/j.freeradbiomed.2022.04.007. Epub 2022 Apr 20.		10.1016/j.freeradbiomed.2022.04.007	PubMed	Relates to apigenin rather than benefits of parsley				1
van Avesaat M, Troost FJ, Westerterp-Plantenga MS, Helyes Z, Le Roux CW, Dekker J, Masclee AA, Keszthelyi D.	Capsaicin-induced satiety is associated with gastrointestinal distress but not with the release of satiety hormones	2016	Am J Clin Nutr. 2016 Feb;103(2):305-13. doi: 10.3945/ajcn.115.123414. Epub 2015 Dec 30.		10.3945/ajcn.115.123414	PubMed	They used an intraduodenal infusion of capsaicin	1
Ashraf R, Aamir K, Shaikh AR, Ahmed T.	Effects of garlic on dyslipidemia in patients with type 2 diabetes mellitus	2005	J Ayub Med Coll Abbottabad. 2005 Jul-Sep;17(3):60-4.			PubMed	This used a standardised extract of garlic	1
Wickenberg J, Lindstedt S, Nilsson J, Hlebowicz J.	Cassia cinnamon does not change the insulin sensitivity or the liver enzymes in subjects with impaired glucose tolerance.	2014	Nutr J. 2014 Sep 24;13:96. doi: 10.1186/1475-2891-13-96. PMID: 25249415; PMCID: PMC4180052.		10.1186/1475-2891-13-96	PubMed	Too high dose to be considered culinary?	1
Joseph MSc A, John PhD F, Thomas MSc JV, Sivadasan SDP, Maliakel PhD B, Mohan PhD R, I M K.	Influence of a Novel Food-Grade Formulation of Red Chili Extract (Capsicum annum) on Overweight Subjects: Randomized, Double-Blinded, Placebo-Controlled Study	2021	J Diet Suppl. 2021;18(4):387-405. doi: 10.1080/19390211.2020.1780363. Epub 2020 Jun 24.		10.1080/19390211.2020.1780363	PubMed	Used a novel chilli and fenugreek extract	1
Gupta A, Gupta R, Lal B.	Effect of Trigonella foenum-graecum (fenugreek) seeds on glycaemic control and insulin resistance in type 2 diabetes mellitus: a double blind placebo controlled study	2001	J Assoc Physicians India. 2001 Nov;49:1057-61.			PubMed	Used an alcoholic extract	1
Uchio R, Okuda-Hanafusa C, Saji R, Kawasaki K, Muroyama K, Murosaki S, Yamamoto Y, Hirose Y.	A Hot Water Extract of Curcuma longa L. Improves Fasting Serum Glucose Levels in Participants with Low-Grade Inflammation: Reanalysis of Data from Two Randomized, Double-Blind, Placebo-Controlled Trials	2022	Nutrients. 2022 Sep 13;14(18):3763. doi: 10.3390/nu14183763.		10.3390/nu14183763	PubMed	Used an extract (not tea)	1
Ranasinghe P, Jayawardena R, Pigera S, Wathurapatha WS, Weeratunga HD, Premakumara GAS, Katulanda P, Constantine GR, Galappaththy P.	Evaluation of pharmacodynamic properties and safety of Cinnamomum zeylanicum (Ceylon cinnamon) in healthy adults: a phase I clinical trial	2017	BMC Complement Altern Med. 2017 Dec 28;17(1):550. doi: 10.1186/s12906-017-2067-7.		10.1186/s12906-017-2067-7	PubMed	Used an extract of cinnamon	1
Ghaffarzadegan T, Zanzer YC, Östman E, Hållenius F, Essén S, Sandahl M, Nyman M.	Postprandial Responses of Serum Bile Acids in Healthy Humans after Ingestion of Turmeric before Medium/High-Fat Breakfasts	2019	Mol Nutr Food Res. 2019 Nov;63(21):e1900672. doi: 10.1002/mnfr.201900672. Epub 2019 Aug 22.		10.1002/mnfr.201900672	PubMed	Used an extract of turmeric	1
Mahdavi-Roshan M, Mirmiran P, Arjmand M, Nasrollahzadeh J.	Effects of garlic on brachial endothelial function and capacity of plasma to mediate cholesterol efflux in patients with coronary artery disease	2017	Anatol J Cardiol. 2017 Aug;18(2):116-121. doi: 10.14744/AnatolJCardiol.2017.7669. Epub 2017 May 24.		10.14744/AnatolJCardiol.2017.7669	PubMed	Used commercially produced standardised garlic tablets	1
Simons LA, Balasubramaniam S, von Konigsmark M, Parfitt A, Simons J, Peters W.	On the effect of garlic on plasma lipids and lipoproteins in mild hypercholesterolaemia	1995	Atherosclerosis. 1995 Mar;113(2):219-25. doi: 10.1016/0021-9150(94)05449-s.		10.1016/0021-9150(94)05449-s	PubMed	Used commercially produced standardised garlic tablets	1
Peleg A, Hershcovici T, Lipa R, Anbar R, Redler M, Beigel Y.	Effect of garlic on lipid profile and psychopathologic parameters in people with mild to moderate hypercholesterolemia	2003	Isr Med Assoc J. 2003 Sep;5(9):637-40.			PubMed	Used commercially produced standardised garlic tablets	1
Sangouni AA, Mohammad Hosseini Azar MR, Alizadeh M.	Effects of garlic powder supplementation on insulin resistance, oxidative stress, and body composition in patients with non-alcoholic fatty liver disease: A randomized controlled clinical trial	2020	Complement Ther Med. 2020 Jun;51:102428. doi: 10.1016/j.ctim.2020.102428. Epub 2020 May 11.		10.1016/j.ctim.2020.102428	PubMed	Used commercially produced standardised garlic tablets	1
Legnani C, Frascaro M, Guazzaloca G, Ludovici S, Cesarano G, Coccheri S.	Effects of a dried garlic preparation on fibrinolysis and platelet aggregation in healthy subjects	1993	Arzneimittelforschung. 1993 Feb;43(2):119-22.			PubMed	Used commercially produced standardised garlic tablets	1
Byrne DJ, Neil HA, Vallance DT, Winder AF.	A pilot study of garlic consumption shows no significant effect on markers of oxidation or sub-fraction composition of low-density lipoprotein including lipoprotein(a) after allowance for non-compliance and the placebo effect	1999	Clin Chim Acta. 1999 Jul;285(1-2):21-33. doi: 10.1016/s0009-8981(99)00063-7.		10.1016/s0009-8981(99)00063-7	PubMed	Used commercially produced standardised garlic tablets	1
Gardner CD, Chatterjee LM, Carlson JJ.	The effect of a garlic preparation on plasma lipid levels in moderately hypercholesterolemic adults	2001	Atherosclerosis. 2001 Jan;154(1):213-20. doi: 10.1016/s0021-9150(00)00466-4.		10.1016/s0021-9150(00)00466-4	PubMed	Used commercially produced standardised garlic tablets	1
Superko HR, Krauss RM.	Garlic powder, effect on plasma lipids, postprandial lipemia, low-density lipoprotein particle size, high-density lipoprotein subclass distribution and lipoprotein(a)	2000	J Am Coll Cardiol. 2000 Feb;35(2):321-6. doi: 10.1016/s0735-1097(99)90541-7.		10.1016/s0735-1097(99)90541-7	PubMed	Used commercially produced standardised garlic tablets	1
Aalami-Harandi R, Karamali M, Asemi Z.	The favorable effects of garlic intake on metabolic profiles, hs-CRP, biomarkers of oxidative stress and pregnancy outcomes in pregnant women at risk for pre-eclampsia: randomized, double-blind, placebo-controlled trial	2015	J Matern Fetal Neonatal Med. 2015;28(17):2020-7. doi: 10.3109/14767058.2014.977248. Epub 2014 Nov 7.		10.3109/14767058.2014.977248	PubMed	Used commercially produced standardised garlic tablets	1
Brosche T, Platt D, Dorner H.	The effect of a garlic preparation on the composition of plasma lipoproteins and erythrocyte membranes in geriatric subjects	1990	Br J Clin Pract Suppl. 1990 Aug;69:12-9.			PubMed	Used commercially produced standardised garlic tablets	1
Ashraf R, Khan RA, Ashraf I.	Garlic (Allium sativum) supplementation with standard antidiabetic agent provides better diabetic control in type 2 diabetes patients	2011	Pak J Pharm Sci. 2011 Oct;24(4):565-70.			PubMed	Used commercially produced standardised garlic tablets	1
Mahdavi-Roshan M, Zahedmehr A, Mohammad-Zadeh A, Sanati HR, Shakerian F, Firouzi A, Kiani R, Nasrollahzadeh J.	Effect of garlic powder tablet on carotid intima-media thickness in patients with coronary artery disease: a preliminary randomized controlled trial	2013	Nutr Health. 2013 Apr;22(2):143-55. doi: 10.1177/0260106014563446. Epub 2015 Jan 8.		10.1177/0260106014563446	PubMed	Used commercially produced standardised garlic tablets	1
Munday JS, James KA, Fray LM, Kirkwood SW, Thompson KG.	Daily supplementation with aged garlic extract, but not raw garlic, protects low density lipoprotein against in vitro oxidation	1999	Atherosclerosis. 1999 Apr;143(2):399-404. doi: 10.1016/s0021-9150(98)00293-7.		10.1016/s0021-9150(98)00293-7	PubMed	Used commercially produced standardised garlic tablets	1
Jung EM, Jung F, Mrowietz C, Kiesewetter H, Pindur G, Wenzel E.	Influence of garlic powder on cutaneous microcirculation. A randomized placebo-controlled double-blind cross-over study in apparently healthy subjects	1991	Arzneimittelforschung. 1991 Jun;41(6):626-30.			PubMed	Used commercially produced standardised garlic tablets	1
Jung F, Jung EM, Mrowietz C, Kiesewetter H, Wenzel E.	Influence of garlic powder on cutaneous microcirculation: a randomised, placebo-controlled, double-blind, crossover study in apparently healthy subjects	1990	Br J Clin Pract Suppl. 1990 Aug;69:30-5.			PubMed	Used commercially produced standardised garlic tablets	1
Wolf S, Reim M, Jung F.	Effect of garlic on conjunctival vessels: a randomised, placebo-controlled, double-blind trial	1990	Br J Clin Pract Suppl. 1990 Aug;69:36-9.			PubMed	Used commercially produced standardised garlic tablets	1
Morovati A, Pourghassem Gargari B, Sarbakhsh P, Azari H, Lotfi-Dizaji L.	The effect of cumin supplementation on metabolic profiles in patients with metabolic syndrome: A randomized, triple blind, placebo-controlled clinical trial	2019	Phytother Res. 2019 Apr;33(4):1182-1190. doi: 10.1002/ptr.6313. Epub 2019 Feb 14.		10.1002/ptr.6313	PubMed	Used essential oil	1
Ansari ZM, Nasiruddin M, Khan RA, Haque SF.	Protective role of Nigella sativa in diabetic nephropathy: A randomized clinical trial	2017	Saudi J Kidney Dis Transpl. 2017 Jan-Feb;28(1):9-14. doi: 10.4103/1319-2442.198093.		10.4103/1319-2442.198093	PubMed	Used nigella oil	1
Rashidmayvan M, Vandyousefi S, Barati M, Salamat S, Ghodrat S, Khorasanchi M, Jahan-Mihan A, Nattagh-Eshtivani E, Mohammadshahi M.	The effect of nigella sativa supplementation on cardiometabolic outcomes in patients with non-alcoholic fatty liver: A randomized double-blind, placebo-controlled trial	2022	Complement Ther Clin Pract. 2022 Aug;48:101598. doi: 10.1016/j.ctcp.2022.101598. Epub 2022 May 8.		10.1016/j.ctcp.2022.101598	PubMed	Used nigella oil	1
Neeraja, A., Rajyalakshmi, P.	Hypoglycemic effect of processed fenugreek seeds in humans	1996	Journal of Food Science and Technology		https://www.scopus.com/inward/record.uri?eid=2-s2.0-0030232204&partnerID=40&md5=a6d3a41a0764476de18103d9304e2966	Scopus	Used processed seeds	1
Razmpoosh, E., Safi, S., Nadjarzadeh, A., Fallahzadeh, H., Abdollahi, N., Mazaheri, M., Nazari, M., Salehi-Abargouei, A.	The effect of Nigella sativa supplementation on cardiovascular risk factors in obese and overweight women: a crossover, double-blind, placebo-controlled randomized clinical trial	2021	European Journal of Nutrition	10.1007/s00394-020-02374-2	https://www.scopus.com/inward/record.uri?eid=2-s2.0-85090110766&doi=10.1007%2fs00394-020-02374-2&partnerID=40&md5=6f573041c6105e4aae0763392e3bfd0d	Scopus	Uses an extract	1
Safi, S., Razmpoosh, E., Fallahzadeh, H., Mazaheri, M., Abdollahi, N., Nazari, M., Nadjarzadeh, A., Salehi-Abargouei, A.	The effect of Nigella sativa on appetite, anthropometric and body composition indices among overweight and obese women: A crossover, double-blind, placebo-controlled, randomized clinical trial	2021	Complementary Therapies in Medicine	10.1016/j.ctim.2020.102653	https://www.scopus.com/inward/record.uri?eid=2-s2.0-85100640655&doi=10.1016%2fj.ctim.2020.102653&partnerID=40&md5=f8d41246ee4a128429d2307e47eafbee	Scopus	Uses an extract	1
Morovati, A., Pourghassem Gargari, B., Sarbakhsh, P., Azari, H., Lotfi-Dizaji, L.	The effect of cumin supplementation on metabolic profiles in patients with metabolic syndrome: A randomized, triple blind, placebo-controlled clinical trial	2019	Phytotherapy Research	10.1002/ptr.6313	https://www.scopus.com/inward/record.uri?eid=2-s2.0-85061598242&doi=10.1002%2fptr.6313&partnerID=40&md5=3815144af526124baf68386f3dac5aa4	Scopus	Uses an extract	1
Moss M, Smith E, Milner M, McCready J.	Acute ingestion of rosemary water: Evidence of cognitive and cerebrovascular effects in healthy adults	2018	J Psychopharmacol. 2018 Dec;32(12):1319-1329. doi: 10.1177/0269881118798339. Epub 2018 Oct 15.		10.1177/0269881118798339	PubMed	Uses an extract of rosemary	1
Isaacsohn JL, Moser M, Stein EA, Dudley K, Davey JA, Liskov E, Black HR.	Garlic powder and plasma lipids and lipoproteins: a multicenter, randomized, placebo-controlled trial	1998	Arch Intern Med. 1998 Jun 8;158(11):1189-94. doi: 10.1001/archinte.158.11.1189.		10.1001/archinte.158.11.1189	PubMed	Uses kwai garlic tablets containing black fermented garlic	1
Mostafa TM, Hegazy SK, Elnaidany SS, Shehabeldin WA, Sawan ES.	Nigella sativa as a promising intervention for metabolic and inflammatory disorders in obese prediabetic subjects: A comparative study of Nigella sativa versus both lifestyle modification and metformin	2021	J Diabetes Complications. 2021 Jul;35(7):107947. doi: 10.1016/j.jdiacomp.2021.107947. Epub 2021 May 8.		10.1016/j.jdiacomp.2021.107947	PubMed	Uses Nigella oil capsules	1
Ghitea TC, El-Kharoubi A, Ganea M, Bimbo-Szuhai E, Nemeth TS, Ciavoi G, Foghis M, Dobjanschi L, Pallag A, Micle O.	The Antimicrobial Activity of Origanum vulgare L. Correlated with the Gastrointestinal Perturbation in Patients with Metabolic Syndrome	2021	Molecules. 2021 Jan 8;26(2):283. doi: 10.3390/molecules26020283.		10.3390/molecules26020283	PubMed	Uses oregano essential oil	1
Neeraja A	Hypoglycemic effect of processed fenugreek seeds in humans.	1996	Journal of Food Science and Technology 33(5), pp. 427-430.			PubMed	Uses processed fenugreek	1	13	51	5

## Sheet: Supplementary Table 2
		Jadad Score
		Randomisation			Blinding/masking			Account of all subjects	TOTAL	Study Quality
Herb or spice	Paper	1 point if randomisation is mentioned	1 point if the method is appropriate (computer, toss coin)	Minus 1 point group assignment was inappropriate by day of the week	1 point for blinding (double blind, or blinded)	1 point for appropriate method (indentical tablets, placebo)	Minus 1 point inappropriate methods (incomplete masking)	1 point if withdrawal or status of all patients are known (e.g. those entering trial and results are all accounted for)	(out of 5)	0 - 2 = low; 3 - 5 = high
Cardamom	Verma et al, 2009	0	0	0	0	0	0	1	1	Low
	Kazemi et al, 2017	1	1		1	1		1	5	High
	Aghasi et al, 2019	1	1		1	1		1	5	High
	Daneshi-Maskooni et al, 2019	1	1		1	1		1	5	High
	Ghazi Zahedi et al, 2022	1	1		1	1		1	5	High
	Ghazi Zahedi et al, 2021	1	1		1	1		1	5	High
	Daneshi-Maskooni et al, 2018	1	1		1	1		1	5	High
	Cheshmeh et al, 2022a	1	1		1	1		1	5	High
	Cheshmeh et al, 2022b	1	1		1	1		1	5	High
Chilli	Clegg et al, 2013	1						1	2	Low
	Ahuja et al, 2006a	1	1					1	3	High
	Ahuja & Ball, 2006	1						1	2	Low
	Ahuja et al, 2007	1	1					1	3	High
	Kroff et al, 2017	1	1						2	Low
	Reinbach et al, 2010	1							1	Low
	Kang et al, 2016	1						1	2	Low
	Yuan et al, 2015	1	1		1		-1	1	3	High
	Shi et al, 2017b
	Shi et al, 2017a
	Chaiyasit et al, 2009	0	0	0				1	1	Low
	Janssen et al, 2013	1			1		-1	1	2	Low
	Janssen et al, 2014	1			1		-1	1	2	Low
Cinnamon	Solomon & Blannin, 2009	1			1	1			3	High
	Vanschoonbeek et al, 2006				1	1			2	Low
	Solomon & Blannin, 2007	1							1	Low
	Hlebowicz et al, 2009	1	1					1	3	High
	Markey et al, 2011	1			1	1		1	4	High
	Wickenberg et al, 2012	1	1		1	1	-1		3	High
	Gutierrez et al, 2016	1	1		1	1		1	5	High
	Sahib, 2016	1							1	Low
	Magistrelli & Chezem, 2012	1						1	2	Low
	Bernardo et al, 2015	1						1	2	Low
	Hlebowicz et al, 2007	0			1		-1	1	1	Low
	Atkinson et al, 2008	1						1	2	Low
	Kort & Lobo, 2014	1	1		1	1		1	5	High
	Crawford, 2009	1	1		1		-1	1	3	High
	Suppapitiporn et al, 2006	1			1				2
	Blevins et al, 2007	1	1		1	1		1	5	High
	Askari et al, 2014	1	1		1	1		1	5	High
	Talaei et al, 2017	1			1	1		1	4	High
	Mirmiran et al, 2019	1	1		1	1		1	5	High
	Khan & Begum, 2019	1	1		1	1		1	5	High
	Davari et al, 2020	1	1		1	1		1	5	High
	Altschuler et al, 2007	1	1		1	1		1	5	High
	Akilen et al, 2010	1	1		1	1		1	5	High
	Wainstein et al, 2011	1				1		1	3	High
	Zahedifar, 2018	1			1	1			3	High
	Zahmatkesh et al, 2012	1			1	1		1	4	High
	Borzoei et al, 2017	1	1		1			1	4	High
	Borzoei et al, 2018	1	1		1	1		1	5	High
	Mirfeizi et al, 2016	1	1		1	1		1	5	High
	Mirmiranpour et al, 2020	1	1		1	1		1	5	High
	Khan et al, 2003	1				1		1	3	High
	Gupta Jain et al, 2017	1	1		1	1		1	5	High
	Lira Neto et al, 2022	1	1		1	1		1	5	High
	Zare et al, 2019	1			1	1		1	4	High
	Hajimonfarednejad et al, 2018	1	1		1	1		1	5	High
	Soares et al, 2022	1				1			2	Low
	Mettler et al, 2009	1						1	2	Low
Cinnamon and ginger	Dastgheib et al, 2022	1	1		1	1		1	5	High
Cinnamon, cardamom, saffron, ginger	Azimi et al, 2016	1	1		1			1	4	High
Cumin	Zare et al, 2014	1	1		1		-1	1	3	High
Cumin and cinnamon	Pishdad et al, 2018	1	1		1	1		1	5	High
Fennel and fenugreek	Bae et al, 2015	1			1		-1	1	2	Low
Fenugreek	Sowmya &Rajyalakshmi, 1999							1	1	Low
	Sharma et al, 1990	1
	Madar et al, 1988
	Kiss et al, 2018	1	1		1	1		1	5	High
	Gopalpura et al, 2007				1			1	2	Low
	Kassaian et al, 2009							1	1	Low
	Losso et al, 2009	1			1			1	3	High
	Robert et al, 2016	1							1	Low
	Najdi et al, 2019	1	1						2	Low
	Tavakoly et al, 2018	1	1					1	3	High
	Sharma et al, 1996								0	Low
	Bhadauria & Kushwah, 2021
	Hadi et al, 2020	1	1		1		-1	1	3	High
	Geberemeskel et al, 2019	1							1	Low
	Yousefi et al, 2017	1	1		1	1		1	5	High
	Rafraf et al, 2014	1	1		1	1		1	5	High
	Hassani et al, 2019a	1			1			1	3	High
	Hassani et al, 2019b	1	1		1			1	4	High
	Sharma, 1986	1							1	Low
Garlic	Choudhary et al, 2018	1						1	2	Low
	Bakhsh & Chughtai, 1984							1	1	Low
	Roberts et al, 1998
	Scharbert et al, 2007	1			1		-1		1	Low
	Aslani et al, 2016	1			1		-1	1	2	Low
	Qidwai et al, 2000
	van Doorn et al, 2006	1			1	1		1	4	High
	Sangouni et al, 2020a	1	1		1	1		1	5	High
	Sangouni et al, 2020b	1	1		1	1		1	5	High
	Sangouni et al, 2021	1	1		1	1		1	5	High
	Zhang et al, 2020
Garlic and coriander seed	Zeb et al, 2018	1			1		-1		1	Low
Ginger	Kamari et al, 2023	1			1	1		1	4	High
	Miyamoto et al, 2015				1	1		1	3	High
	Janssen et al, 1996	1			1	1		1	4	High
	Mansour et al, 2012	1						1	2	Low
	Shidfar et al, 2015	1			1	1		1	4	High
	Zarezadeh et al, 2018	1	1		1	1		1	5	High
	Rafie et al, 2020	1	1		1	1		1	5	High
	Mohammadzadeh Honarvar et al, 2019	1	1		1	1		1	5	High
	Mahluji et al, 2013b	1			1			1	3	High
	Mahluji et al, 2013a	1			1	1		1	4	High
	Mozaffari-Khosravi et al, 2014	1	1		1	1		1	5	High
	Ebrahimzadeh Attari et al, 2015	1	1		1	1		1	5	High
	Hajimoosayi et al, 2020	1	1		1			1	4	High
	Attari et al, 2015	1	1		1	1		1	5	High
	Ashraf et al, 2022	1	1		1	1		1	5	High
	Arablou et al, 2014	1			1	1		1	4	High
	Ebrahimzadeh Attari et al, 2016	1	1		1	1		1	5	High
	Carvalho et al, 2020	1	1		1			1	4	High
	Khandouzi et al, 2015	1	1		1	1		1	5	High
	Alizadeh-Navaei et al, 2008	1			1	1			3	High
Ginger and fenugreek	Bordia et al, 1997								0	Low
Mustard, black pepper, ginger, horseradish	Gregersen et al, 2013	1	1		1		-1	1	3	High
Nigella seeds	Mohtashami, 2019	1			1	1		1	4	High
	Mohtashami et al, 2016	1			1	1		1	4	High
	Pelegrin et al, 2019	1			1				2	Low
	Bamosa et al, 2010	1						1	2	Low
	Ibrahim et al, 2014a								0	Low
	Ibrahim et al, 2014b	1			1				2	Low
	Badar et al, 2017				1	1		1	3	High
	Qidwai et al, 2009	1			1	1		1	4	High
	Farhangi et al, 2016	1	1		1	1		1	5	High
	Darand et al, 2019a	1	1		1	1		1	5	High
	Darand et al, 2019b	1			1	1		1	4	High
	Farhangi &Tajmiri, 2020	1	1		1	1		1	5	High
	Kaatabi et al, 2015	1	1		1	1		1	5	High
	Shirazi et al, 2020	1	1		1	1		1	5	High
	Datau et al, 2010	1			1			1	3	High
	Sabzghabaee et al, 2012	1	1		1	1		1	5	High
Rosemary	Akbari et al, 2022	1	1		1	1		1	5	High
Sage	Sá et al, 2009							1	1	Low
Turmeric	Darmian et al, 2021	1	1		1	1		1	5	High
	Wickenberg et al, 2010	1	1		1	1		1	5	High
	Maithili Karpaga Selvi et al, 2015	1	1					1	3	High
	Navekar et al, 2017	1	1		1	1		1	5	High
	Darmian et al, 2022	1	1		1			1	4	High
	Adab et al, 2019	1	1		1	1		1	5	High
	Jarhahzadeh et al, 2021	1			1			1	3	High
	Srinivasan et al, 2019	1	1		1	1		1	5	High
Turmeric and Nigella seed	Amin et al, 2015	1	1		1	1		1	5	High
Turmeric and cinnamon	Lee et al, 2014	1	1		1	1		1	5	High
Turmeric and red pepper spice	Nieman et al, 2012	1			1	1		1	4	High
